# Supplementary material for: An Fe-MOF nanosheet array with superior activity towards the alkaline oxygen evolution reaction
Source: Royal Society of Chemistry journal article supplement (doi:10.1039/c8qi00163d), 2018-01-01
Supplement: c8qi00163d1.pdf [file c8qi00163d1.pdf]

## Electronic Supplementary Information

### Experimental section

**Materials:** Nickel foam (NF) was provided by Hongshan District, Wuhan Instrument Surgical Instruments business, and treated in hydrochloric acid (HCl) to serve as substrate for active materials.  $\text{FeCl}_3 \cdot 6\text{H}_2\text{O}$ , terephthalic acid (HCl) and N, N-dimethylformamide (DMF) were purchased from Aladdin Ltd. in Shanghai.  $\text{C}_2\text{H}_5\text{OH}$  was purchased by Chengdu Kelon Chemical Reagent Factory. All chemical reagents were used as received without further purification. The water used throughout all experiments was purified through a Millipore system.

**Preparation of Fe-MOF/NF:** Fe-MOF/NF was prepared as follows. A piece of NF was first treated with concentrated HCl, ethanol and deionized water by sonication sequentially to obtain a clean surface before use. To prepare Fe-MOF/NF using a hydrothermal reaction, 1 mmol  $\text{FeCl}_3 \cdot 6\text{H}_2\text{O}$  (0.2703 g) and 1 mmol terephthalic acid (0.166 g) were dissolved in 35 mL DMF to form a solution. 2.5 mL ethanol and 2.5 mL distilled water were added slowly to the solution under constant stirring. Then the solution was transferred to a 50 mL Teflon-lined stainless-steel autoclave in which a piece of NF was immersed into the solution. The autoclave was sealed and maintained at 125 °C for 12 h in an electric oven to obtain Fe-MOF/NF. After the autoclave cooled down naturally, the Fe-MOF/NF was taken out and washed with water and ethanol for several times, followed by drying 2 h at 60 °C.

**Synthesis of  $\text{RuO}_2$ :**  $\text{RuO}_2$  was prepared in accordance with reported work.<sup>1</sup> Briefly, 2.61 g of  $\text{RuCl}_3 \cdot 3\text{H}_2\text{O}$  and 1.0 mL KOH (1.0 M) were added into 100 mL distilled water and stirred for 45 min at 100 °C. Then the above solution was centrifuged for 10 min and filtered. The precipitates were collected by centrifugation and washed with water for several times, followed by drying at 70 °C. Finally, the product was annealed at 300 °C for 3 h under air atmosphere.  $\text{RuO}_2$  ink was prepared by dispersing 20 mg of catalyst into 490  $\mu\text{L}$  of water/ethanol (v/v = 1:1) and 10  $\mu\text{L}$  of 5 wt% Nafion using sonication for 30 min. Then 29.5  $\mu\text{L}$  of the  $\text{RuO}_2$  ink (containing 1.475 mg of  $\text{RuO}_2$ ) was loaded onto a bare NF of 0.25  $\text{cm}^2$  in geometric area (loading:

5.9 mg cm<sup>-2</sup>).

**Characterizations:** Transmission electron microscopy (TEM) images were collected on a HITACHI H-8100 electron microscopy (Hitachi, Tokyo, Japan) operated at 200 kV. Scanning electron microscopy (SEM) measurements were performed on a XL30 ESEM FEG scanning electron microscope at an accelerating voltage of 20 kV. X-ray photoelectron spectroscopy (XPS) spectra were acquired on an ESCALABMK II X-ray photoelectron spectrometer using Mg as the exciting source.

**Electrochemical measurements:** Electrochemical measurements were performed with a CHI 660E electrochemical analyzer (CH Instruments, Inc., Shanghai) in a standard three-electrode system using a Fe-MOF/NF as the working electrode, a graphite plate as the counter electrode and Hg/HgO as the reference electrode. The potentials reported in this work were calibrated to RHE, using the following equation:  $E(\text{RHE}) = E(\text{Hg/HgO}) + (0.098 + 0.059 \text{ pH}) \text{ V}$ . Polarization curves were obtained by linear sweep voltammetry with a scan rate of 5 mV s<sup>-1</sup>. All experiments were carried out at room temperature (~25 °C).

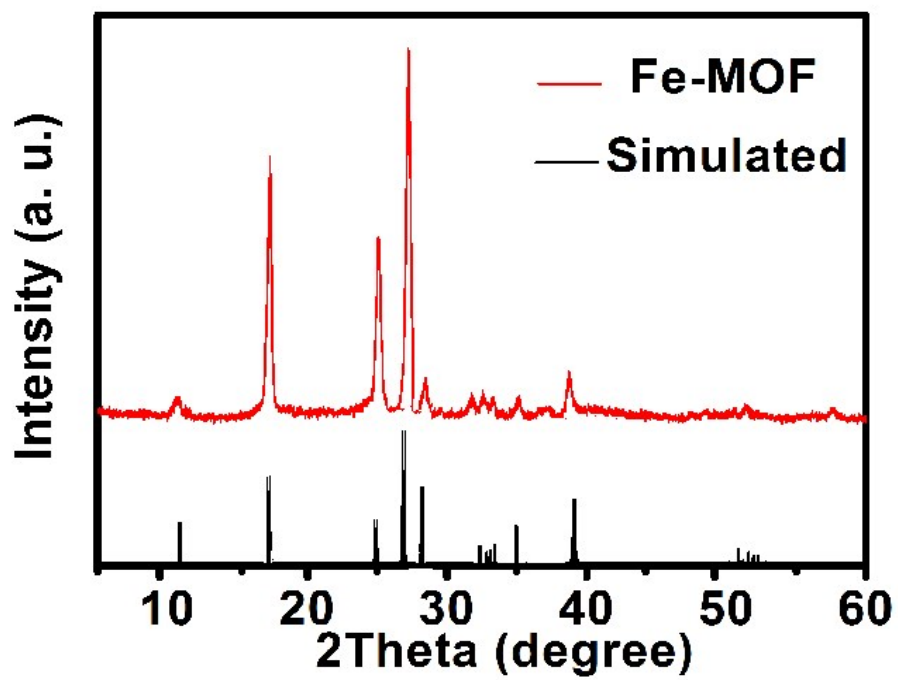

Fig. S1. XRD pattern for Fe-MOF powder.

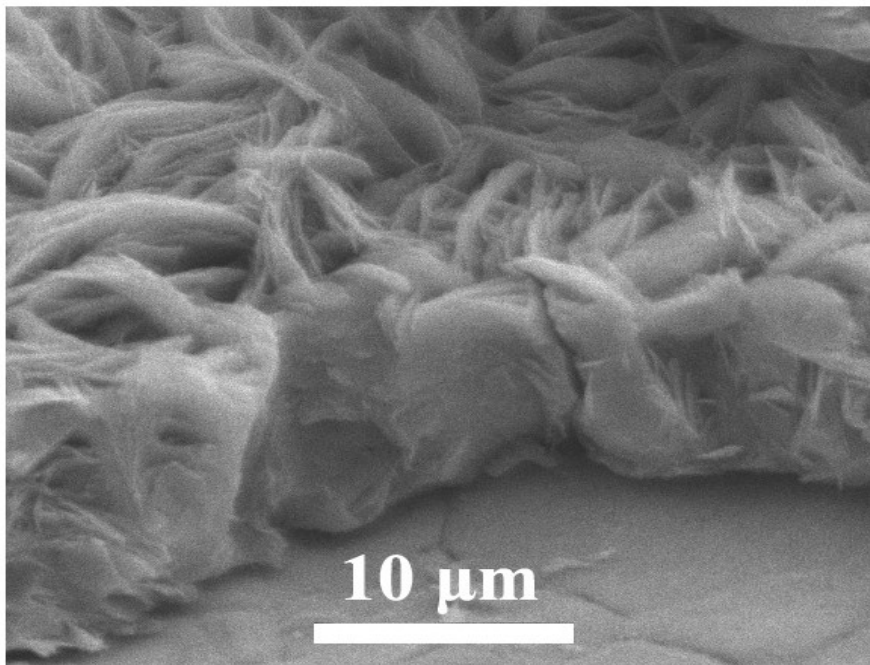

**Fig. S2. Cross-section SEM image of Fe-MOF/NF.**

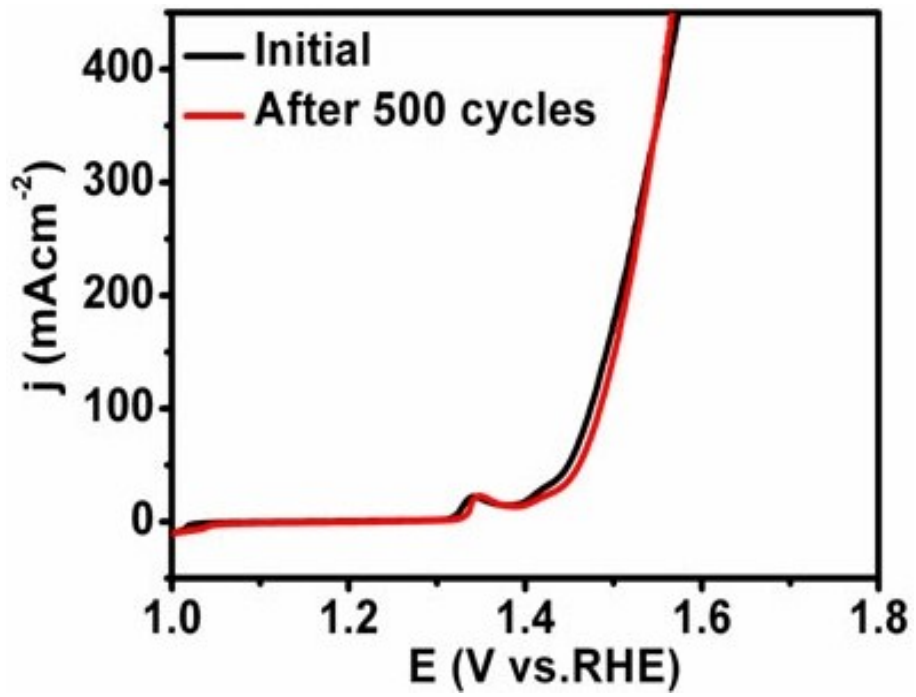

**Fig. S3.** LSV curves recorded of Fe-MOF/NF before and after 500 CV cycles in 1.0 M KOH.

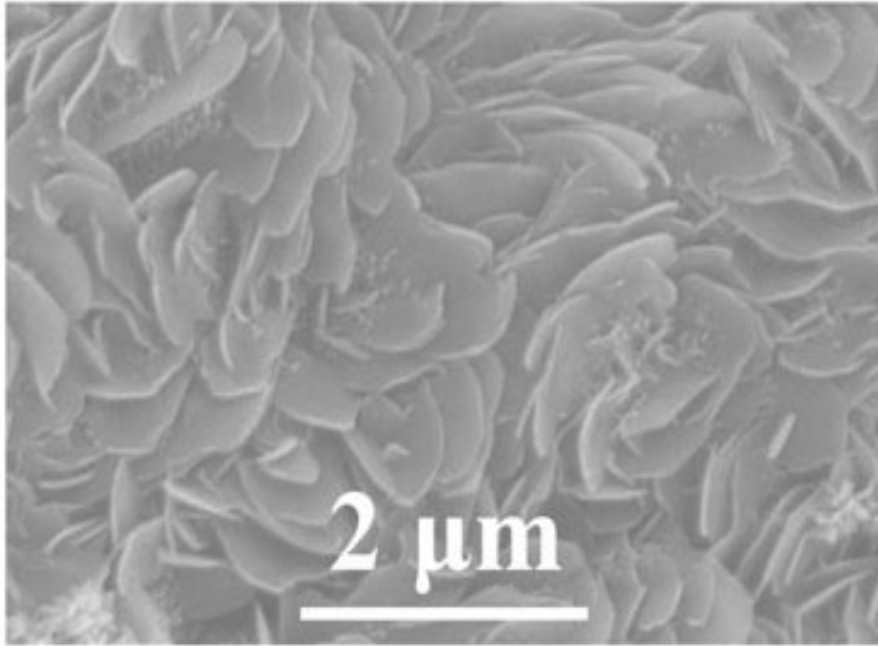

**Fig. S4.** SEM image of Fe-MOF/NF after stability test.

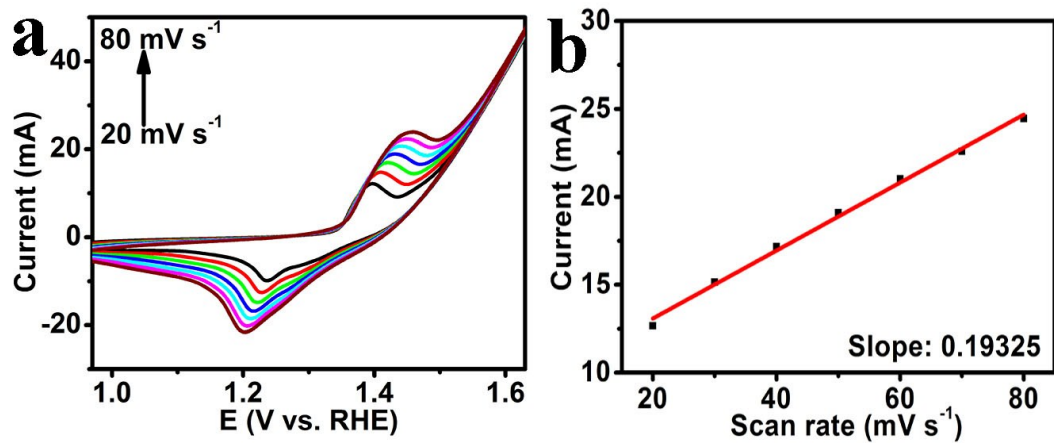

**Fig. S5.** (a) CVs of Fe-MOF/NF under different scan rates increasing from 20 to 80  $\text{mV s}^{-1}$  in 1.0 M KOH. (b) Linear relationship of the oxidation peak currents vs. scan rates for Fe-MOF/NF.

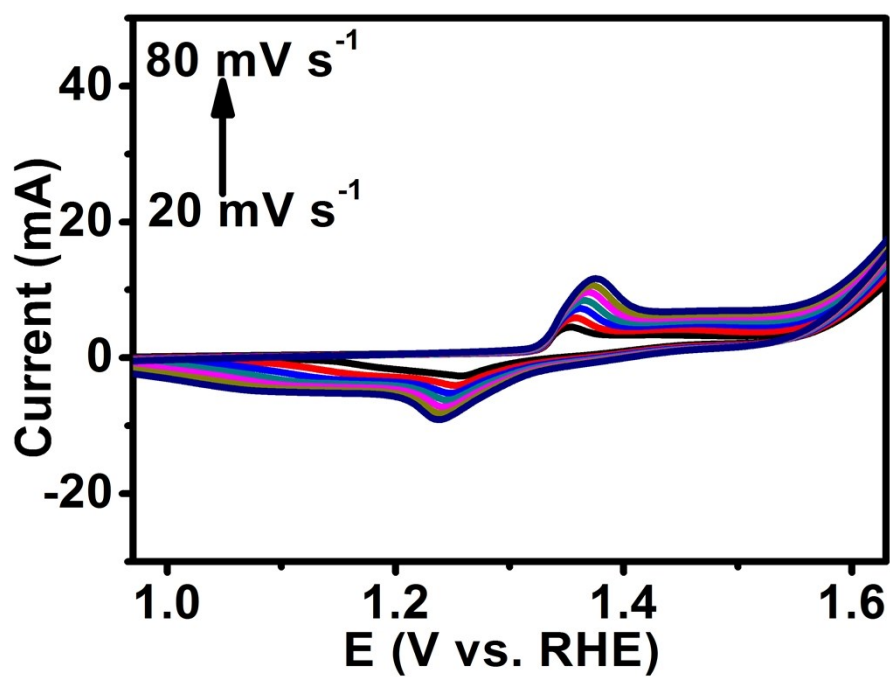

**Fig. S6.** CVs of Ni foam under different scan rates increasing from 20 to 80 mV s<sup>-1</sup> in 1.0 M KOH.



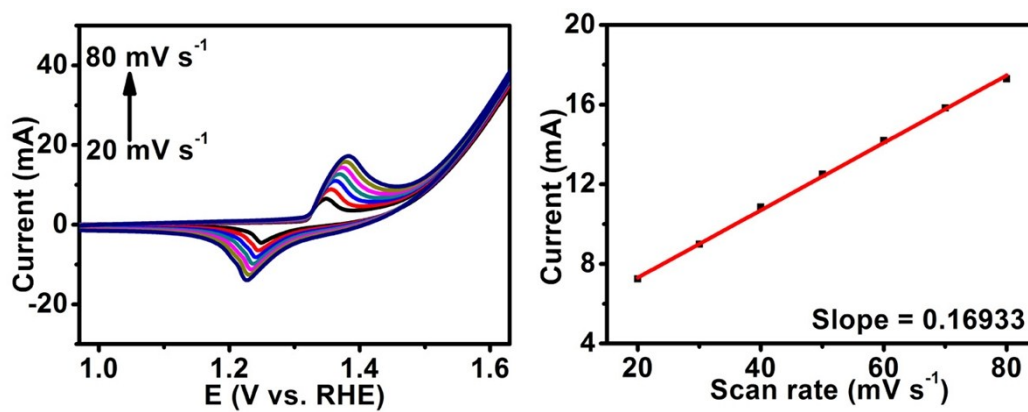

**Fig. S7** (a) CVs of RuO<sub>2</sub>/NF different scan rates increasing from 20 to 80 mV s<sup>-1</sup> in 1.0 M KOH. (b) Linear relationship of the oxidation peak currents vs. scan rates for RuO<sub>2</sub>/NF.

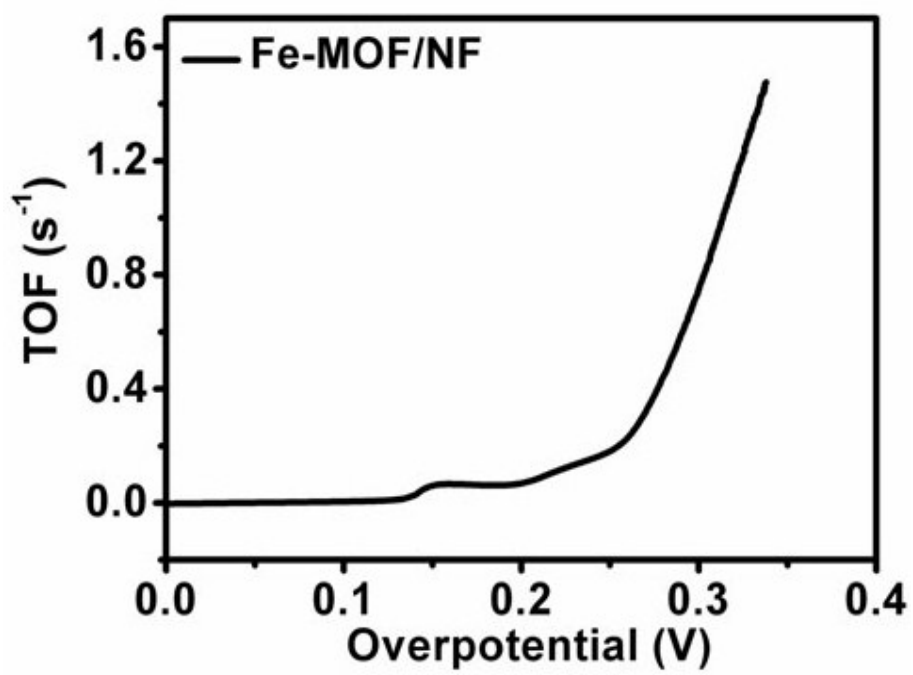

Fig. S8. Plot of TOF vs. overpotential for Fe-MOF/NF.

**Table S1.** Comparison of the OER activity for Fe-MOF/NF with other non-noble-metal electrocatalysts in alkaline media.

| Catalyst                                                | j<br>(mA cm <sup>-2</sup> ) | $\eta$ (mV) | Electrolyte | Ref.      |
|---------------------------------------------------------|-----------------------------|-------------|-------------|-----------|
| Fe-MOF/NF                                               | 50                          | 240         | 1.0 M KOH   | This work |
| Fe <sub>x</sub> N                                       | 50                          | 270         | 1.0 M KOH   | 2         |
| iron oxide                                              | 10                          | 339         | 1.0 M KOH   | 2         |
| Iron Phosphide Nanotubes                                | 20                          | 300         | 1.0 M KOH   | 3         |
| Fe <sub>1.1</sub> Mn <sub>0.9</sub> P                   | 10                          | 430         | 1.0 M KOH   | 4         |
| FeP@Au                                                  | 10                          | 320         | 1.0 M KOH   | 5         |
| (Co <sub>0.54</sub> Fe <sub>0.46</sub> ) <sub>2</sub> P | 10                          | 370         | 1.0 M KOH   | 6         |
| FeS <sub>x</sub>                                        | 10                          | 420         | 0.1 M KOH   | 7         |
| iron oxyhydroxide                                       | 20                          | 510         | 1.0 M NaOH  | 8         |
| Ni <sub>2</sub> P nanoparticles                         | 10                          | 290         | 1.0 M KOH   | 9         |
| CoNi SUNOE                                              | 10                          | 450         | 1.0 M KOH   | 10        |
| Fe-Ni oxide                                             | 10                          | >375        | 1.0 M KOH   | 11        |
| NiCo LDH                                                | 10                          | 367         | 1.0 M KOH   | 12        |
| NiOOH                                                   | 10                          | 525         | 1.0 M KOH   | 13        |
| NiFe LDH/NF                                             | 10                          | 269         | 1.0 M KOH   | 14        |
| NiFe-NS                                                 | 10                          | 300         | 1.0 M KOH   | 15        |
| NiFe-LDH/CNT                                            | 10                          | 250         | 1.0 M KOH   | 16        |
| Co-P film                                               | 10                          | 345         | 1.0 M KOH   | 17        |
| Co-Ni-Fe <sub>511</sub>                                 | 10                          | 288         | 1.0 M KOH   | 18        |
| Ni-Fe (oxy) hydroxide                                   | 10                          | 275         | 1.0 M KOH   | 19        |

## References

- 1 J. C. Cruz, V. Baglio, S. Siracusano, V. Antonucci, A. S. Aricò, R. Ornelas, L. Ortiz-Frade, G. Osorio-Monreal, S. M. Durón-Torres and L. G. Arriaga, *Int. J. Electrochem. Sci.*, 2011, **6**, 6607–6619.
- 2 F. Yu, H. Zhou, Z. Zhu, J. Sun, R. He, J. Bao, S. Chen and Z. Ren, *ACS Catal.*, 2017, **7**, 2052–2057.
- 3 Y. Yan, B. Xia, X. Ge, Z. Liu, A. Fisher and X. Wang, *Chem. Eur. J.*, 2015, **21**, 48062–18067.
- 4 D. Li, H. Baydoun, B. Kulikowski and S. L. Brock, *Chem. Mater.*, 2017, **29**, 3048–3054.
- 5 J. Masud, S. Umapathi, N. Ashokaan and M. Nath, *J. Mater. Chem. A*, 2016, **4**, 9750–9754.
- 6 E. J. Popczun, C. W. Roske, C. G. Read, J. C. Crompton, J. M. McEnaney, J. F. Callejas, N. S. Lewis and R. E. Schaak, *J. Mater. Chem. A*, 2015, **3**, 5420–5425.
- 7 B. C. M. Martindale and E. Reisner, *Adv. Energy Mater.*, 2016, **6**, 1502905.
- 8 D. R. Chowdhury, L. Spicia, S. S. Amritphale, A. Paul and A. Singh, *J. Mater. Chem. A*, 2016, **4**, 3655–3660.
- 9 L.-A. Stern, L. Feng, F. Song and X. Hu, *Energy Environ. Sci.*, 2015, **8**, 2347–2351.
- 10 B. Ni and X. Wang, *Chem. Sci.*, 2015, **6**, 3572–3576.
- 11 J. Landon, E. Demeter, N. İnoğlu, C. Keturakis, I. E. Wachs, R. Vasić, A. I. Frenkel and J. R. Kitchin, *ACS Catal.*, 2012, **2**, 1793–1801.
- 12 H. Liang, F. Meng, M. Cabán-Acevedo, L. Li, A. Forticaux, L. Xiu, Z. Wang and S. Jin, *Nano Lett.*, 2015, **15**, 1421–1427.
- 13 S. Klaus, Y. Cai, M. W. Louie, L. Trotochaud and A. T. Bell, *J. Phys. Chem. C*, 2015, **119**, 7243–7254.
- 14 J. Luo, J.-H. Im, M. T. Mayer, M. Schreier, M. K. Nazeeruddin, N.-G. Park, S. D. Tilley, H. Fan and M. Graetzel, *Science*, 2014, **345**, 1593–1596.
- 15 F. Song and X. Hu, *Nat. Commun.*, 2014, **5**, 4477.

- 16 M. Gong, Y. Li, H. Wang, Y. Liang, J. Z. Wu, J. Zhou, J. Wang, T. Regier, F. Wei and H. Dai, *J. Am. Chem. Soc.*, 2013, **135**, 8452–8455.
- 17 N. Jiang, B. You, M. Sheng and Y. Sun, *Angew. Chem., Int. Ed.*, 2015, **54**, 6251–6254.
- 18 G. Zeng, M. Liao, C. Zhou, X. Chen, Y. Wang and D. Xiao, *RSC Adv.*, 2016, **6**, 42255–42262.
- 19 A. S. Batchellor and S. W. Boettcher, *ACS Catal.*, 2015, **5**, 6680–6689.
